# Supplementary material for: Nanoarchitectonics and Kinetics Insights into Fluoride Removal from Drinking Water Using Magnetic Tea Biochar
Source: MDPI journal article supplement (doi:10.3390/ijerph192013092), 2022-10-12
Supplement: s1 [file ijerph-1907093-supplementary.pdf › ijerph-1907093-supplementary.pdf]

## Supplementary data

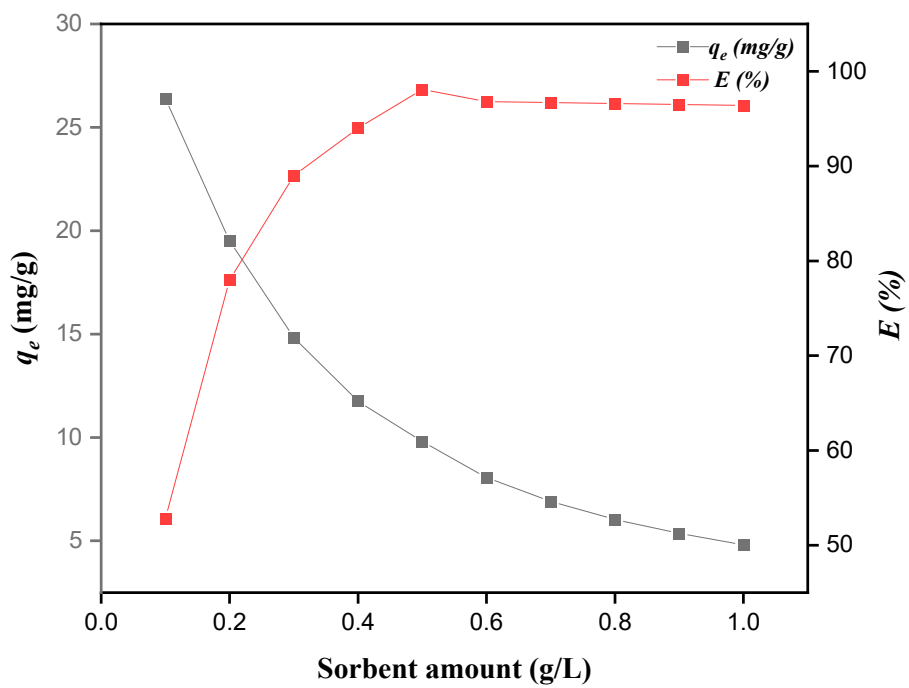

**Figure S1:** Effect of adsorbent dosage on fluoride adsorption.

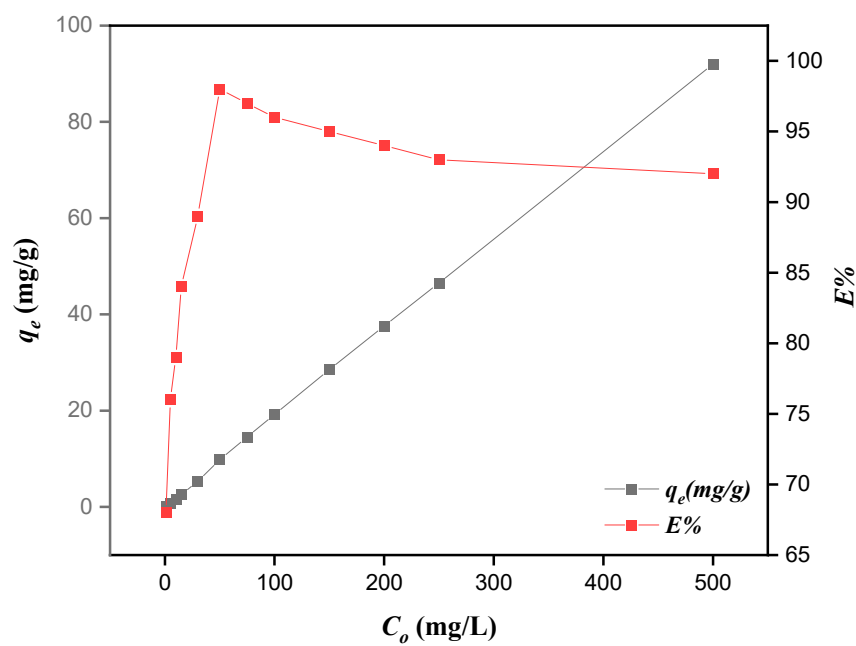

**Figure S2:** Effect of initial fluoride concentration on fluoride adsorption.

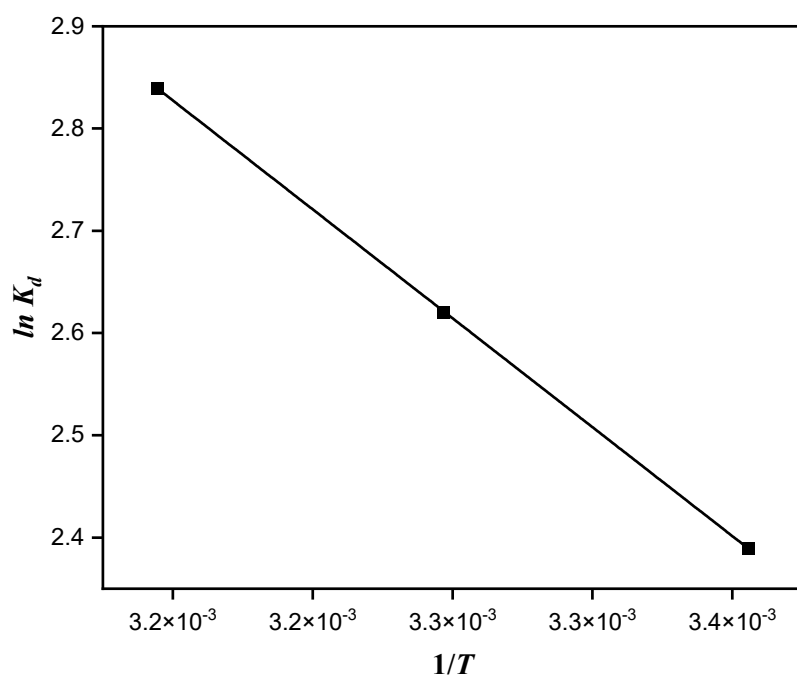

**Figure S3:** Adsorption thermodynamics analysis of fluoride adsorption on MTBC.

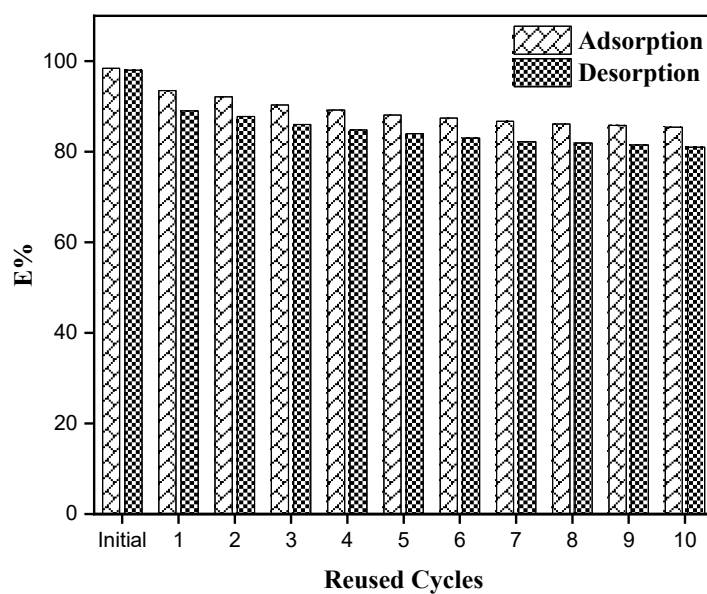

**Figure S4:** Adsorption-desorption reused cycles of MTBC for fluoride adsorption.

**Table S1:** Comparison of some used biochar for fluoride adsorption.

| Adsorbent  | Preparation method        | Temp (K) | Dose (g/L) | pH  | $q_e$ (mg/g) | Isotherms           | Ref |
|------------|---------------------------|----------|------------|-----|--------------|---------------------|-----|
| Rice Straw | One step stream pyrolysis | 298      | 1.5        | 2.0 | 15.5         | Langmuir-Freundlich | 47  |
|            |                           | 318      |            |     | 8.80         |                     |     |
|            |                           | 328      |            |     | 4.25         |                     |     |
| Pinewood   | Fast pyrolysis            | 298      | 10.0       | 2.0 | 7.66         | Langmuir            | 48  |
|            |                           | 308      |            |     | 6.34         |                     |     |
|            |                           | 318      |            |     | 4.46         |                     |     |
| Pine Bark  | Fast pyrolysis            | 298      | 10.0       | 2.0 | 9.77         | Redlich-Peterson    | 48  |
|            |                           | 308      |            |     | 10.53        |                     |     |
|            |                           | 318      |            |     | 8.40         |                     |     |
| CSBC       | Slow pyrolysis            | 298      | 10.0       | 2.0 | 6.42         | Toth                | 48  |
|            |                           | 308      |            |     | 5.17         |                     |     |
|            |                           | 318      |            |     | 5.00         |                     |     |
| MCSBC      | Slow pyrolysis            | 298      | 10.0       | 2.0 | 4.11         | Langmuir            | 49  |
|            |                           | 308      |            |     | 3.45         |                     |     |
|            |                           | 318      |            |     | 3.41         |                     |     |

|              |                          |     |      |          |       |                |            |
|--------------|--------------------------|-----|------|----------|-------|----------------|------------|
| Peanut shell | Oxidative polymerization | RT  | 10.0 | 2.0-10.0 | 17.15 | Langmuir       | 39         |
|              |                          |     |      |          |       | Freundlich     |            |
|              | Impregnated              | 298 |      |          | 7.81  |                |            |
| MDFBC        | pyrolysis                | 308 | 2.0  | 3.0      | 9.04  | Langmuir       | 50         |
|              |                          | 318 |      |          | 7.58  |                |            |
| SRH          | Pyrolysis                | RT  | 4.0  | 8.0      | 12.00 | Langmuir       | 51         |
|              |                          | 298 |      |          | 15.48 | Koble-Corrigan |            |
| BGSBC        | Slow pyrolysis           | 308 | 2.5  | 2.0      | 15.45 |                | 3          |
|              |                          | 318 |      |          | 16.05 | Langmuir       |            |
|              | One step                 | 298 |      |          | 18.78 |                |            |
| MTBC         | pyrolysis                | 308 | 0.5  | 3.6      | 18.43 | Freundlich     | This study |
|              |                          | 318 |      |          | 18.10 |                |            |

Abbreviations: CSBC (corn stover biochar), MCSBC (magnetic corn stover biochar), MDFBC (magnetic douglas fir biochar), SRH (silica rice husk), BGSBC (black gram straw biochar), MTBC (magnetic tea biochar).

**Table S2:** Thermodynamics parameters calculated for fluoride adsorption on MTBC.

| Temperatures | $\Delta G^\circ$ (kJ mol <sup>-1</sup> ) | $\Delta H^\circ$ (kJ mol <sup>-1</sup> ) | $\Delta S^\circ$ (kJ K <sup>-1</sup> mol <sup>-1</sup> ) |
|--------------|------------------------------------------|------------------------------------------|----------------------------------------------------------|
| 298          | -7.51                                    |                                          |                                                          |
| 308          | -6.71                                    | -17.71                                   | -0.08                                                    |
| 318          | -5.92                                    |                                          |                                                          |

**Table S3:** Groundwater characteristics collected from different areas.

|      | pH    | ECs<br>( $\mu$ S/cm) | TDS<br>(mg/L) | Na <sup>+</sup><br>(mg/L) | K <sup>+</sup><br>(mg/L) | Cl <sup>-</sup><br>(mg/L) | SO <sub>4</sub> <sup>2-</sup><br>(mg/L) | NO <sub>3</sub> <sup>-</sup><br>(mg/L) | HCO <sub>3</sub> <sup>-</sup><br>(mg/L) | F <sup>-</sup><br>(mg/L) |
|------|-------|----------------------|---------------|---------------------------|--------------------------|---------------------------|-----------------------------------------|----------------------------------------|-----------------------------------------|--------------------------|
| 1    | 7.81  | 524                  | 745           | 241                       | 2.2                      | 20.3                      | 27                                      | 1.8                                    | 321                                     | 1.71                     |
| 2    | 7.42  | 365                  | 654           | 145                       | 3.4                      | 24.5                      | 34                                      | 1.4                                    | 256                                     | 1.93                     |
| 3    | 7.51  | 254                  | 854           | 365                       | 6.5                      | 18.4                      | 51                                      | 1.1                                    | 415                                     | 0.97                     |
| 4    | 7.54  | 845                  | 459           | 526                       | 4.1                      | 17.6                      | 58                                      | 1.6                                    | 274                                     | 0.74                     |
| 5    | 7.12  | 745                  | 847           | 456                       | 5.1                      | 19.4                      | 62                                      | 0.7                                    | 319                                     | 1.14                     |
| 6    | 7.35  | 658                  | 954           | 254                       | 5.6                      | 18.2                      | 31                                      | 1.9                                    | 284                                     | 1.19                     |
| 7    | 6.89  | 212                  | 756           | 269                       | 3.2                      | 20.4                      | 27                                      | 2.4                                    | 296                                     | 1.48                     |
| 8    | 6.58  | 354                  | 698           | 154                       | 1.4                      | 21.6                      | 24                                      | 0.4                                    | 347                                     | 1.24                     |
| 9    | 7.54  | 684                  | 584           | 321                       | 1.9                      | 22.8                      | 32                                      | 0.9                                    | 486                                     | 1.34                     |
| 10   | 7.21  | 458                  | 675           | 412                       | 1.6                      | 23.1                      | 47                                      | 1.7                                    | 325                                     | 1.47                     |
| Min  | 6.58  | 212                  | 41            | 145                       | 1.4                      | 17.6                      | 24                                      | 0.4                                    | 256                                     | 0.74                     |
| Max  | 7.81  | 845                  | 98            | 526                       | 6.5                      | 24.5                      | 62                                      | 2.4                                    | 486                                     | 1.93                     |
| Mean | 7.297 | 509.9                | 63.8          | 314.3                     | 3.5                      | 20.63                     | 39.3                                    | 1.39                                   | 332.3                                   | 1.321                    |
